# Supplementary material for: Synthesis, Structures and Photophysical Properties of Tetra- and Hexanuclear Zinc Complexes Supported by Tridentate Schiff Base Ligands
Source: MDPI journal article supplement (doi:10.3390/chemistry5020070), 2023-05-02
Supplement: s1 [file s1]

## Supporting Information

### Synthesis, Structures and Photophysical Properties of Tetra- and Hexanuclear Zinc-Hydroxido-Acetato-Clusters Supported by Tridentate Salicylaldiminato Ligands

Tobias Severin,<sup>a</sup> Viktoriia Karabtsova,<sup>a</sup> Martin Börner,<sup>a</sup> Hendrik Weiske,<sup>b</sup> Agnieszka Kuc,<sup>c</sup> and Berthold Kersting,<sup>a,\*</sup>

#### Content

1. Characterization of compounds - Infrared spectroscopy.
2. Packing diagram for **HL**.
3. Determination of Coordination Geometries utilizing SHAPE.
4. Characterization of compounds - NMR spectroscopy
5. Characterization of compounds - UV/vis spectroscopy & Fluorescence spectroscopy
6. Characterization of compounds - DFT calculations
7. Characterization of compounds - Determination of LOD values

## 1. Characterization of compounds - Infrared Spectroscopy

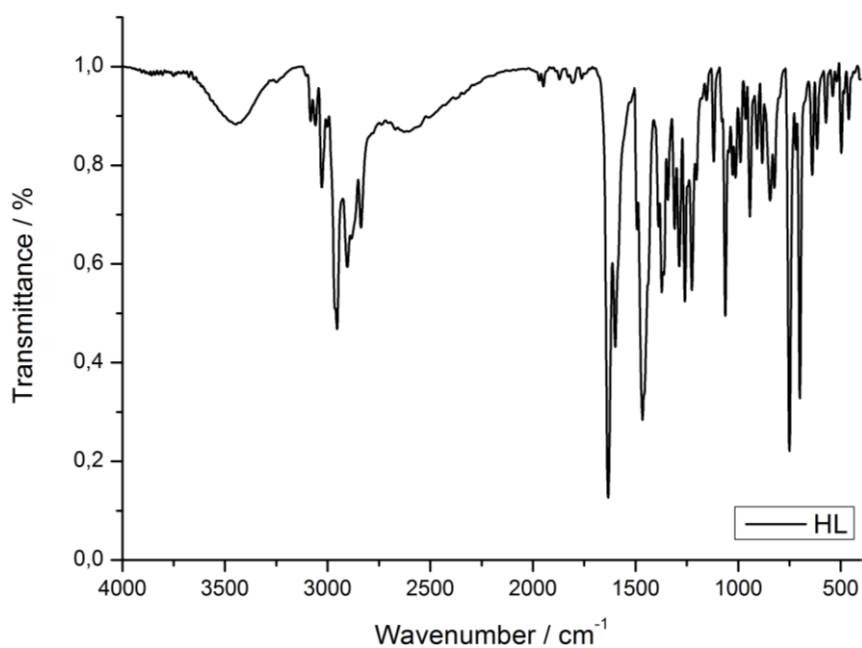

**Figure S1:** FTIR spectrum of **HL** (KBr pellet).

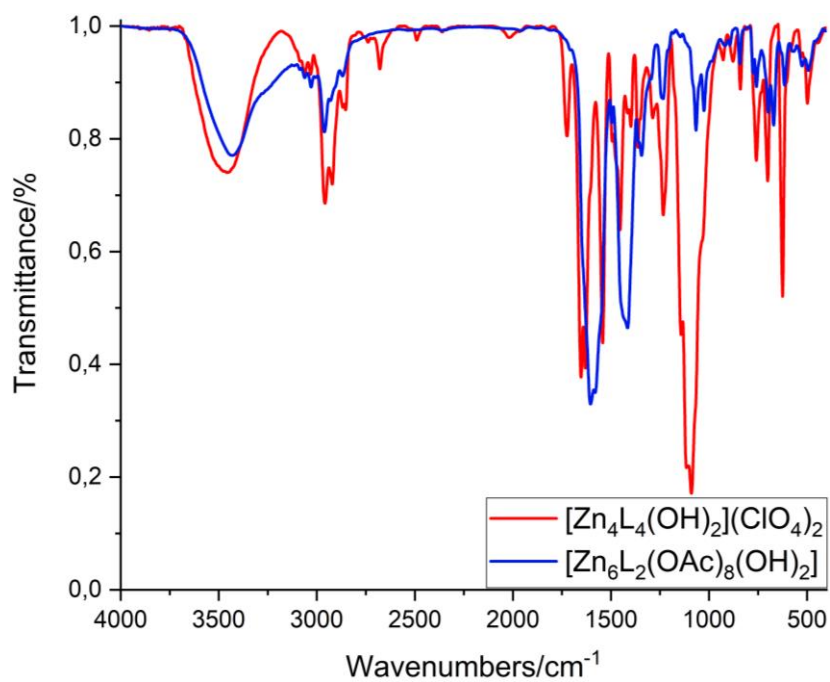

**Figure S2:** FTIR spectra of  $[\text{Zn}_6\text{L}_2(\text{OH})_2(\text{OAc})_8]$  (**1**, KBr pellet) and  $[\text{Zn}_4\text{L}_4(\text{OH})_2](\text{ClO}_4)_2$  (**2**, KBr pellet).

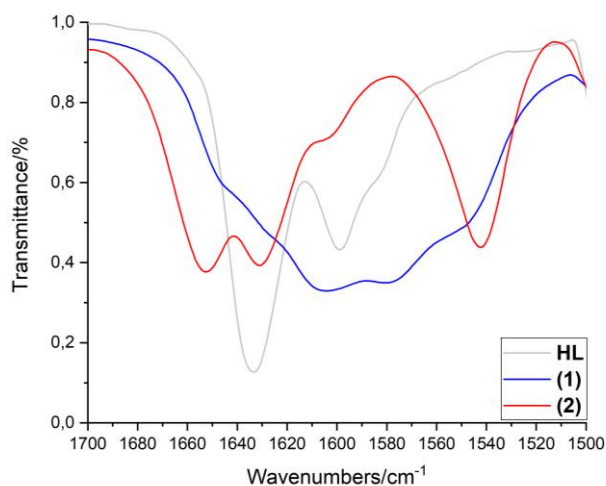

**Figure S3.** Overlay of the FTIR spectra of the ligand (**HL**) and the zinc complexes **1** and **2** (1700-1500 cm⁻¹).

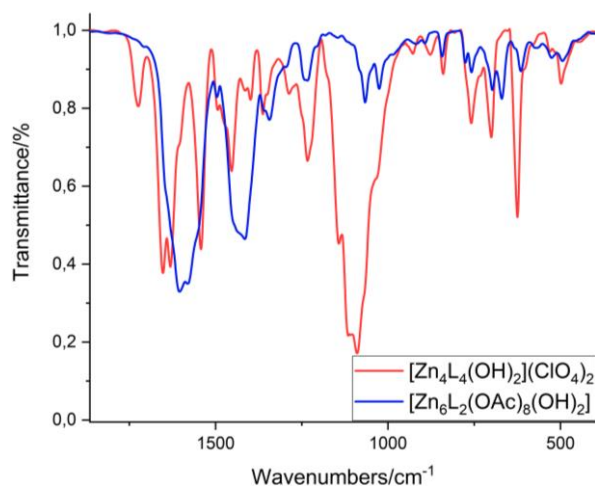

**Figure S4.** Overlay of the FTIR spectra of the zinc complexes **1** and **2** (1750-450 cm⁻¹).

## 2. Packing diagram for HL.

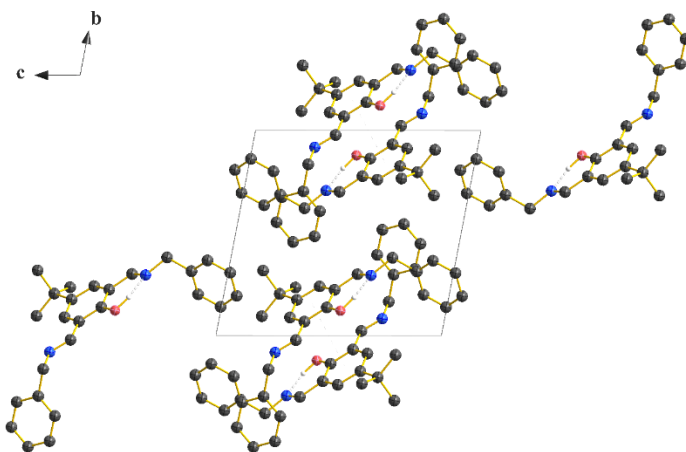

**Figure S5:** Packing diagram of **HL** showing intermolecular  $\pi$ - $\pi$  stacking (offset face-to-face) interactions between adjacent ligand molecules.

### 3. Determination of Coordination Geometries utilizing SHAPE

The coordination geometries of the zinc complexes were examined utilizing the SHAPE program. According to SHAPE, deviations from ideal coordination geometry are represented by a symmetry factor, that increases upon increasing distortions from the ideal geometry, for which the deviation factor is zero.

**Table S1. Shape symmetry factors for complex 1**

Six-Coordinated Zinc atoms in **1** (Zn1, Zn4 ) -----

|        |       |                               |
|--------|-------|-------------------------------|
| HP-6   | 1 D6h | Hexagon                       |
| PPY-6  | 2 C5v | Pentagonal pyramid            |
| OC-6   | 3 Oh  | Octahedron                    |
| TPR-6  | 4 D3h | Trigonal prism                |
| JPPY-6 | 5 C5v | Johnson pentagonal pyramid J2 |

| Structure [ML6 ] | HP-6      | PPY-6   | OC-6   | TPR-6   | JPPY-6 |
|------------------|-----------|---------|--------|---------|--------|
| Zn1              | , 31.959, | 24.957, | 0.828, | 13.389, | 28.438 |
| Zn4              | , 31.206, | 25.671, | 0.721, | 13.226, | 29.216 |

Five-Coordinated Zinc atoms in **1** (Zn2, Zn5) -----

|         |       |                                |
|---------|-------|--------------------------------|
| PP-5    | 1 D5h | Pentagon                       |
| vOC-5   | 2 C4v | Vacant octahedron              |
| TBPY-5  | 3 D3h | Trigonal bipyramid             |
| SPY-5   | 4 C4v | Spherical square pyramid       |
| JTBPY-5 | 5 D3h | Johnson trigonal bipyramid J12 |

| Structure [ML5 ] | PP-5      | vOC-5  | TBPY-5 | SPY-5  | JTBPY-5 |
|------------------|-----------|--------|--------|--------|---------|
| Zn2              | , 29.426, | 1.717, | 4.444, | 0.440, | 6.940   |
| Zn5              | , 31.065, | 3.507, | 1.552, | 1.849, | 4.376   |

Four-Coordinated Zinc atoms in **1** (Zn3, Zn6) -----

|         |       |                           |
|---------|-------|---------------------------|
| SP-4    | 1 D4h | Square                    |
| T-4     | 2 Td  | Tetrahedron               |
| SS-4    | 3 C2v | Seesaw                    |
| vTBPY-4 | 4 C3v | Vacant trigonal bipyramid |

| Structure [ML4 ] | SP-4      | T-4    | SS-4   | vTBPY-4 |
|------------------|-----------|--------|--------|---------|
| Zn3              | , 28.540, | 0.502, | 6.311, | 2.797   |
| Zn6              | , 29.538, | 0.350, | 6.655, | 3.021   |

### Shape symmetry factors for complex 2

Zn-Polyeder

|      |       |          |
|------|-------|----------|
| PP-5 | 1 D5h | Pentagon |
|------|-------|----------|

vOC-5        2 C4v   Vacant octahedron  
 TBPY-5      3 D3h   Trigonal bipyramid  
 SPY-5        4 C4v   Spherical square pyramid  
 JTBPY-5     5 D3h   Johnson trigonal bipyramid J12

| Structure [ML5 ] | PP-5      | vOC-5  | TBPY-5 | SPY-5  | JTBPY-5 |
|------------------|-----------|--------|--------|--------|---------|
| Zn1              | , 28.490, | 5.477, | 2.372, | 3.635, | 4.374   |
| Zn2              | , 31.065, | 3.507, | 1.552, | 1.849, | 4.376   |
| Zn3              | , 28.969, | 5.073, | 2.693, | 3.047, | 4.619   |
| Zn4              | , 29.457, | 5.271, | 2.085, | 3.327, | 4.307   |

#### 4. Characterization of compounds - NMR spectroscopy

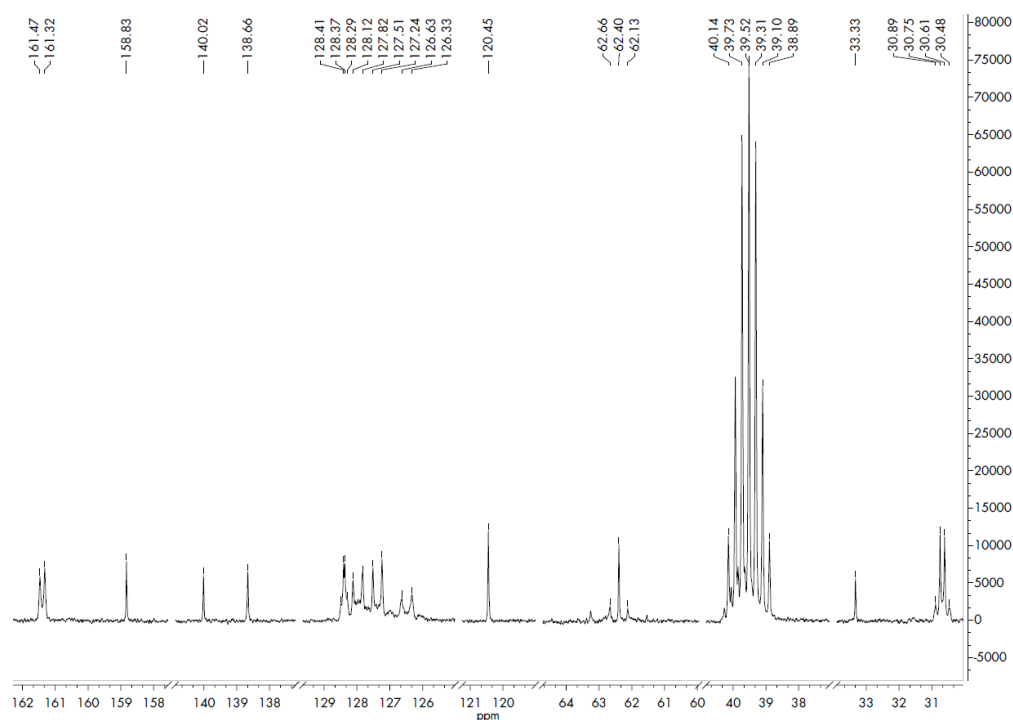

**Figure S6:**  $^{13}\text{C}$ -NMR spectrum of **HL** recorded in dimethylsulfoxide- $d^6$  at 363 K; multiplicity of C-H coupling displayed; parts of the spectrum without signals cut out for better observation of the multiplicities.

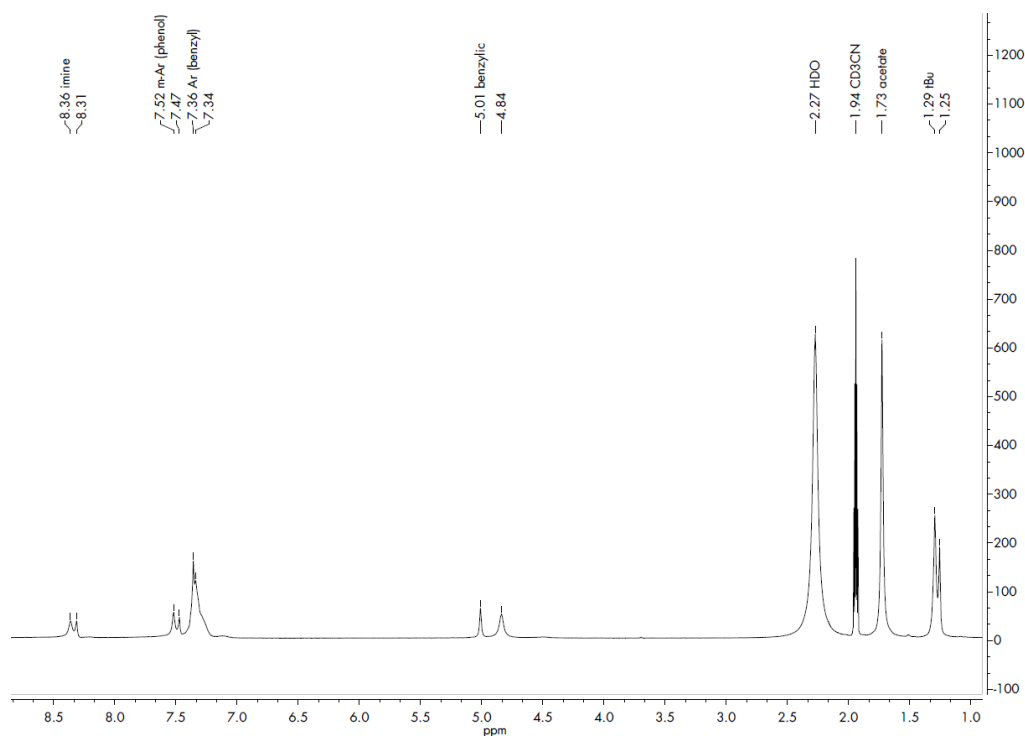

**Figure S7:**  $^1\text{H}$ -NMR spectrum of  $[\text{Zn}_6\text{L}_2(\text{OH})_2(\text{OAc})_8]$  recorded in  $\text{CD}_3\text{CN}$  at ambient temperature.

## 5. UV/vis spectroscopy & Fluorescence spectroscopy

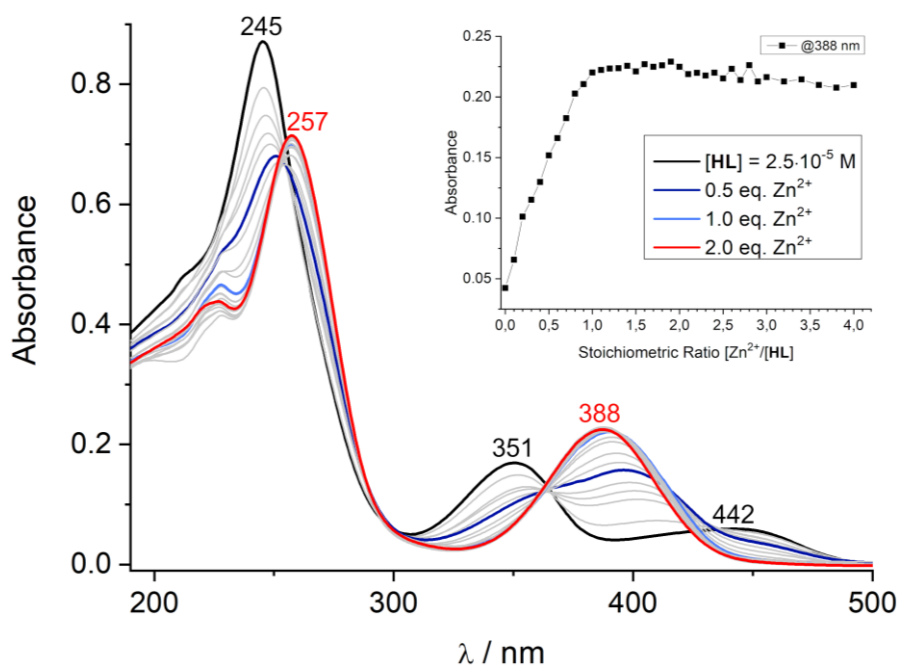

**Figure S8.** Spectrophotometric titration of **HL** with  $\text{Zn}(\text{ClO}_4)_2 \cdot 6 \text{H}_2\text{O}$  in  $\text{CH}_2\text{Cl}_2/\text{MeOH}$  (3:2/v:v) at a  $10^{-5}$  M concentration and constant ionic strength ( $10^{-2}$  M  $\text{N}(n\text{-Bu})_4\text{PF}_6$ ,  $T = 295$  K). The blue curve corresponds to a final  $\text{Zn}^{2+}/\text{HL}$  molar ratio of 1:1. The inset shows the evolution of selected absorbance values versus the  $[\text{Zn}^{2+}]/[\text{HL}]$  molar ratio.

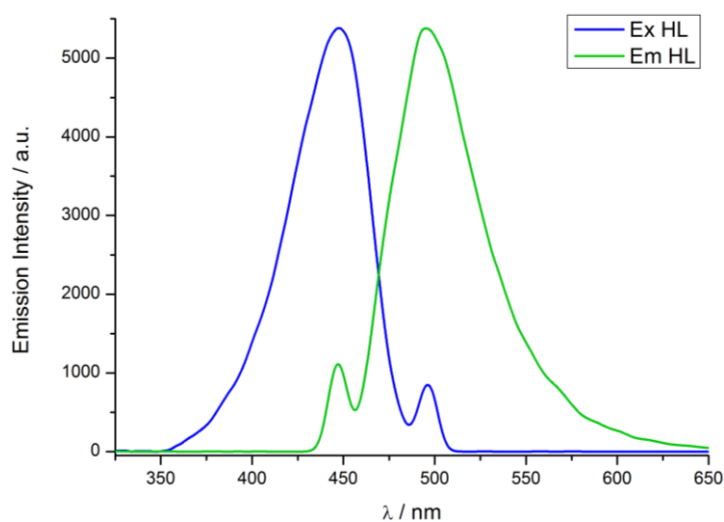

**Figure S9.** Excitation (blue) and emission spectrum (green) of **HL** in acetonitrile ( $c(\text{HL}) = 1 \cdot 10^{-5} \text{ M}$ , 298 K). MeCN;  $1 \cdot 10^{-5} \text{ M}$ ;  $\lambda_{\text{Ex}} = 447 \text{ nm}$ ;  $\lambda_{\text{Em}} = 497 \text{ nm}$

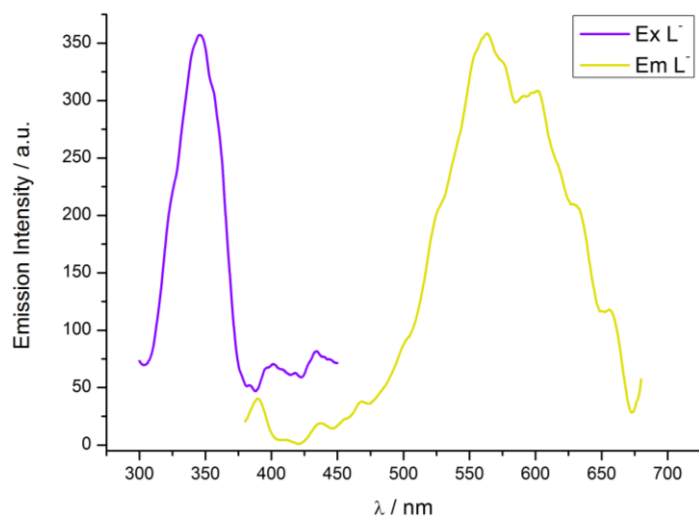

**Figure S10:** Excitation (violet) and emission spectrum (yellow) of **L<sup>-</sup>** in acetonitrile in the presence of base ( $c(\text{HL}) = 1 \cdot 10^{-5} \text{ M}$ ,  $c(\text{NEt}_3) = 1 \cdot 10^{-5} \text{ M}$ , 298 K). MeCN;  $c(\text{HL}) = 1 \cdot 10^{-5} \text{ M}$ ;  $c(\text{NEt}_3) = 1 \cdot 10^{-5} \text{ M}$ ;  $\lambda_{\text{Ex}} = 346 \text{ nm}$ ;  $\lambda_{\text{Em}} = 563 \text{ nm}$

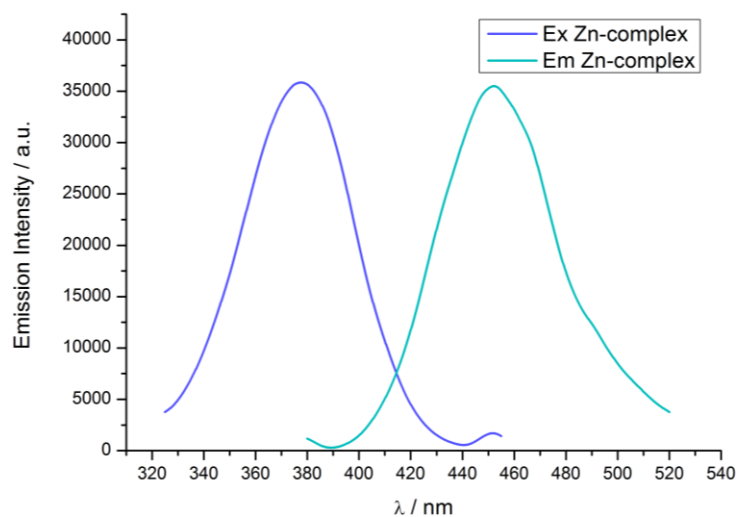

**Figure S11.** Excitation (azure) and emission spectrum (turquoise) of  $[\text{Zn}_6\text{L}_2(\text{OH})_2(\text{OAc})_8]$  in acetonitrile ( $c(\text{complex}) = 1 \cdot 10^{-5} \text{ M}$ , 298 K).  $\lambda_{\text{Ex}} = 378 \text{ nm}$ ;  $\lambda_{\text{Em}} = 452 \text{ nm}$ .

## 6. Characterization of compounds – DFT calculations

a)

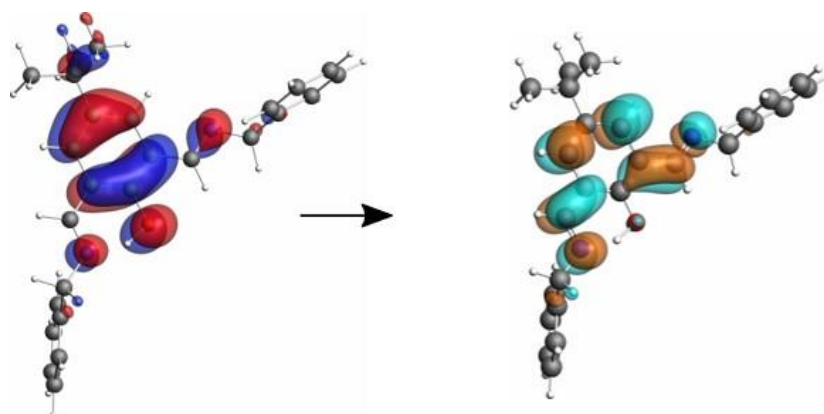

b)

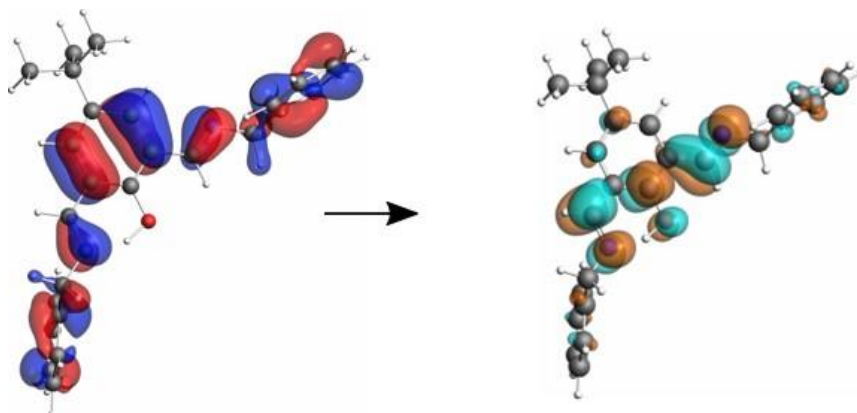

**Figure S12:** Major contributions to the observed UV-Vis bands of **HL** with the single orbital transition contribution in parentheses. a) HOMO→LUMO: 334 nm (97%). b) HOMO-1→LUMO+1: 245 nm (67%).



a)

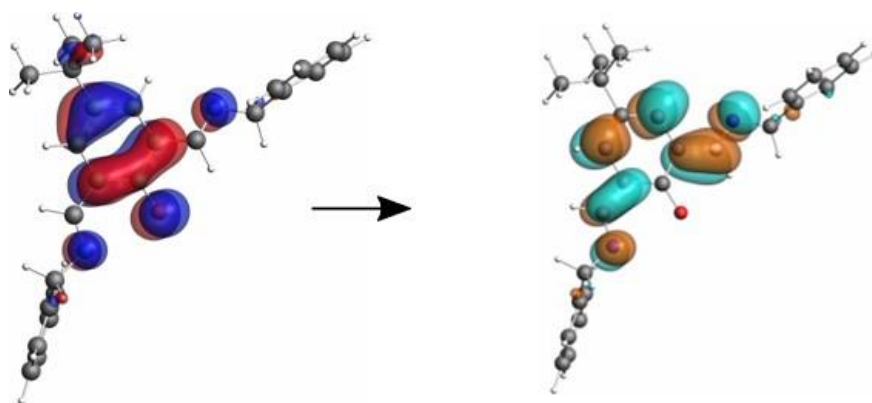

b)

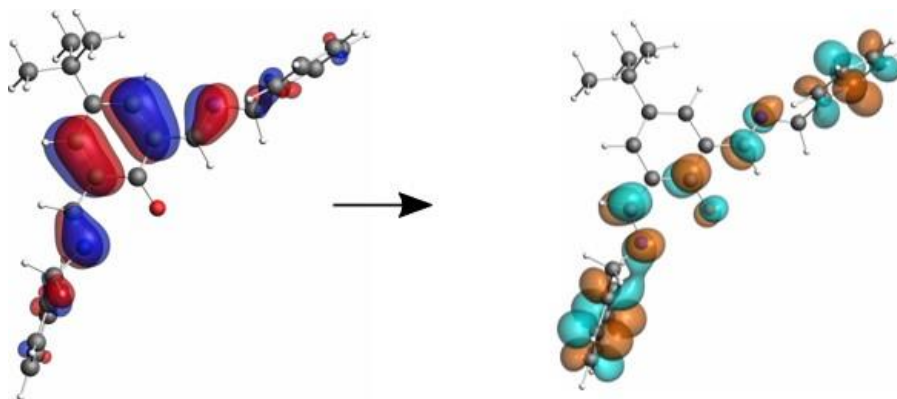

**Figure S13:** Major contributions to the observed UV-Vis bands of  $\text{HL}^-$  with the single orbital transition contribution in parentheses. a) HOMO  $\rightarrow$  LUMO: 409 nm (98%). b) HOMO-2  $\rightarrow$  LUMO+1: 229 nm (36%).

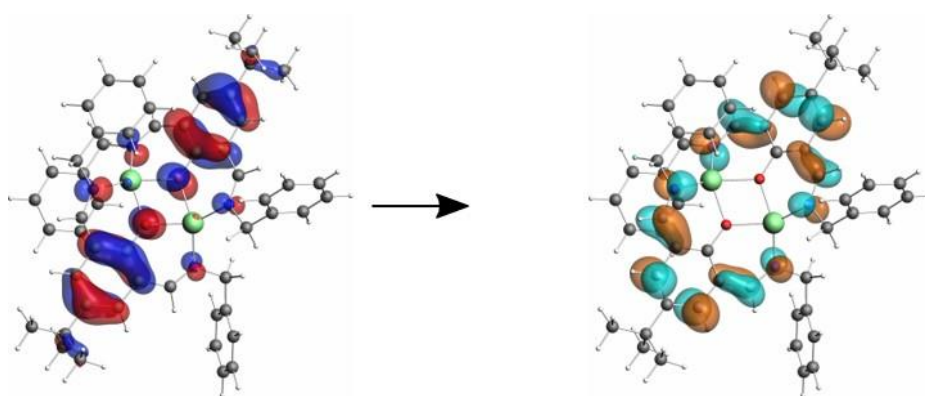

**Figure S14:** Major contributions to the observed UV-Vis bands of  $[\text{Zn}_2\text{L}_2]^{2+}$  with the single orbital transition contribution in parentheses. a) HOMO  $\rightarrow$  LUMO: 348 nm (57%).

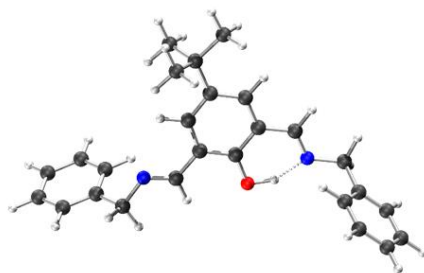

**Figure S15:** PBE-D3(BJ) optimized structure of **HL** used for the simulation of UV-Vis spectra (pristine) and basis for the other used structures.

Calculated atomic coordinates have been deposited at the open access data base zenodo, see <https://doi.org/10.5281/zenodo.7837334>

## 7. Determination of detection limit (LOD value)

The fluorescence intensity of HL at 454 nm as a function of the  $\text{Zn}^{2+}$  ion concentration was found to be linear in the range from  $1 \cdot 10^{-6}$  to  $1 \cdot 10^{-7}$  M. The limit of detection ( $c_{\text{LOD}}$  value;  $c_{\text{LOD}} = 3\sigma_{\text{bl}}/b$ , where  $\sigma_{\text{bl}}$  is the standard deviation of the blank measurements and  $b$  the slope of the regression line according to the IUPAC definition)) is a measure for the lowest concentration that can be measured. The fluorescence titration carried out between HL and  $\text{Zn}^{2+}$  provides a value of 0.24(4) ppm.

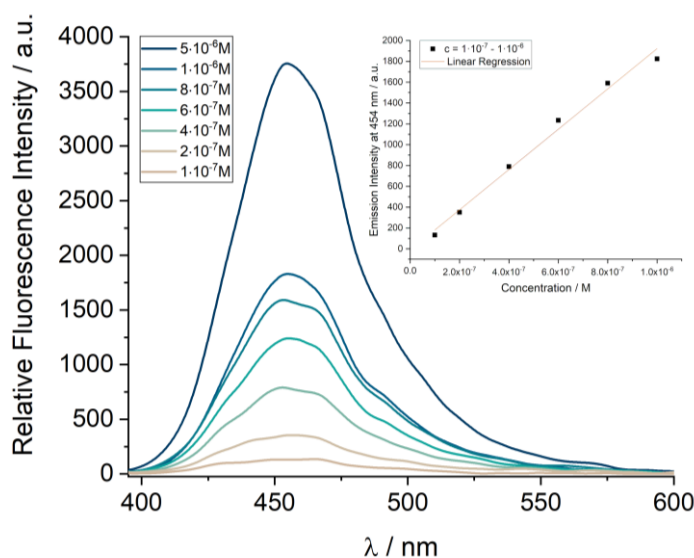

**Figure S16:** Fluorescence spectra **HL** as a function of  $\text{Zn}^{2+}$  ion concentration.
